# Supplementary material for: Molecular level controlled fabrication of highly transparent conductive reduced graphene oxide/silver nanowire hybrid films
Source: Royal Society of Chemistry journal article supplement (doi:10.1039/c4ra07228f), 2014-09-03
Supplement: c4ra07228f1.pdf [file c4ra07228f1.pdf]

## Supporting information:

### **Molecular level controlled fabrication of highly transparent conductive reduced graphene oxide/Ag nanowire hybrid film**

5 Lifang Shi,<sup>a</sup> Junhe Yang,<sup>\*a</sup> Tan Yang,<sup>a</sup> Qiu Hanxun,<sup>a</sup> Jing Li<sup>a</sup> and Qingbin Zheng,<sup>\*a,b</sup>

<sup>a</sup> School of Materials Science and Engineering, University of Shanghai for Science and Technology, Shanghai 200093, China. Tel.: 86-21-55274065 E-mail address: jhyang@usst.edu.cn (J. H. Yang)

10 <sup>b</sup> Leibniz-Institut für Polymerforschung Dresden, Hohe Straße 6, 01069 Dresden, Germany. Tel.: 49-0351-4658486 E-mail address: zheng-qingbin@ipfdd.de (Q. B. Zheng)

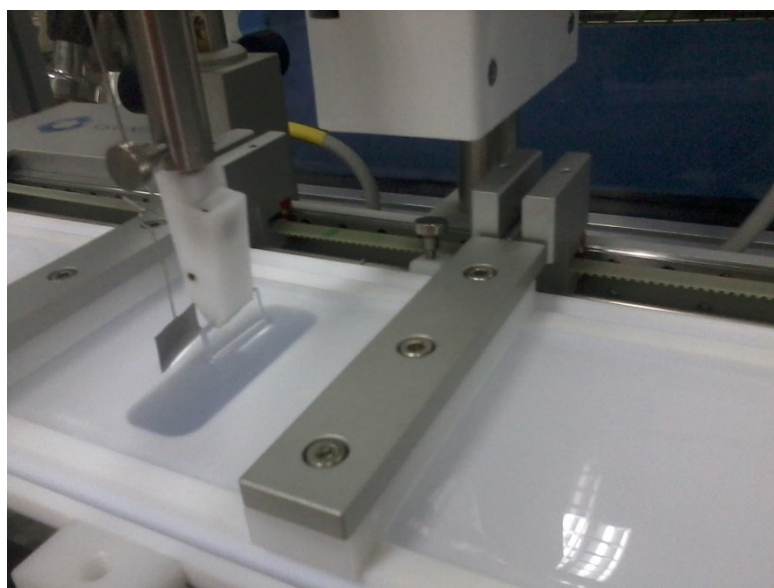

**Fig. S1** Image of the Langmuir-Blodgett (L-B) trough, showing the transfer process of the UL-GO sheets onto the quartzes substrate.

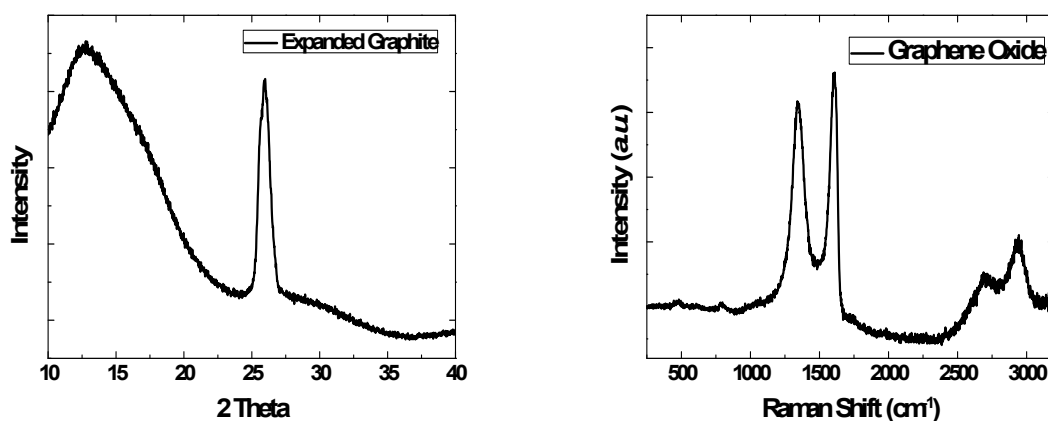

**Fig. S2** XRD spectrum of expanded graphite and 514 nm Raman spectrum of the graphene oxide. The peak around  $13.5^\circ$  indicates an interlayer spacing of 0.61 nm. And the peak around  $27^\circ$  indicate that the interlayer of the expanded graphite were not separated completely as graphene oxide<sup>1</sup>. *D* peak and *D+G* peak, which refer to the defect of the graphene oxide are around  $\sim 1350 \text{ cm}^{-1}$  and  $\sim 2900 \text{ cm}^{-1}$ . *G* peak and *2D+G* peak referring to the crystallinity of the graphene oxide are around  $\sim 1580 \text{ cm}^{-1}$  and  $\sim 2700 \text{ cm}^{-1}$ . The intensity ratio of  $I_D/I_G$  and  $I_{D+G}/I_{2D}$  often used for estimating the  $sp^2$  domain size of graphite-based materials. As the ratio of  $I_D/I_G$  and  $I_{D+G}/I_{2D}$  are 0.82 and 1.39. It showed the graphene oxide was well oxygenated as the ratio of is  $I_{D+G}/I_{2D}$  more sensitive<sup>2</sup>.

**Table S1** Relative percentages of carbon and assignments of UL-GO and rUL-GO.

| Binding energy and<br>assignment | Cg(sp <sup>2</sup> )<br>~284.9eV | Cd(sp <sup>3</sup> )<br>~285.6eV | C-O<br>~287.1eV | C=O<br>~288.1eV | -O-C=O<br>~290.0eV |
|----------------------------------|----------------------------------|----------------------------------|-----------------|-----------------|--------------------|
| UL-GO                            | 36.5%                            | 21.5%                            | 21.8%           | 13.6%           | 6.6%               |
| rUL-GO                           | 74.7%                            | 13%                              | 4.2%            | 4%              | 4.1%               |

**Table S2** DC to optical conductivity ratio of current work and other works.

| Method            | Materials                      | SR (Ω/sq) | T (%) | σ <sub>DC</sub> /σ <sub>Op</sub> | Reference                      |
|-------------------|--------------------------------|-----------|-------|----------------------------------|--------------------------------|
| L-B               | GO /                           | 13        | 71.9  | 81                               | Current Work                   |
| Spin-coating      | Ag NW                          | 64        | 94    | 93.7                             | Kholmanov et al. <sup>3</sup>  |
| CVD Doping        | Graphene /                     | 202       | 96    | 45.3                             | Shin et al. <sup>4</sup>       |
| Spin-coating      | Ag NW/<br>GO                   | 86        | 80    | 18.6                             | Gao et al. <sup>5</sup>        |
|                   | CNT/<br>GO/<br>Ag NW-<br>Au NP | 26        | 83    | 74.2                             | Kholmanov et al. <sup>6</sup>  |
| Self-assembly     | GO/<br>Ag NW                   | 86        | 80    | 19.8                             | Tien et al. <sup>7</sup>       |
| Dip coating       | GO/<br>Ag NW                   | 150       | 86    | 16.0                             | Yun et al. <sup>8</sup>        |
| Transfer printing | GO/<br>Ag NW                   | 27        | 80    | 59.1                             | Zhang et al. <sup>9</sup>      |
|                   | GO/<br>Ag NW                   | 210       | 97    | 58.5                             | Domingues et al. <sup>10</sup> |
| Vacuum filtration | GO/<br>Ag NP                   | 93        | 78    | 15.3                             | Tien et al. <sup>11</sup>      |

## References

1. Y. Si and E. T. Samulski, *Chem. Mater.*, 2008, **20**, 6792–6797.
2. L. Shi, J. Yang, Z. Huang, J. Li, Z. Tang, Y. Li and Q. Zheng, *Applied Surface Science*, 2013, **276**, 437-446.
3. I. N. Kholmanov, C. W. Magnuson, A. E. Aliev, H. Li, B. Zhang, J. W. Suk, L. L. Zhang, E. Peng, S. H. Mousavi, A. B. Khanikaev, R. Piner, G. Shvets and R. S. Ruoff, *Nano letters*, 2012, **12**, 5679-5683.
4. D. H. Shin, K. W. Lee, J. S. Lee, J. H. Kim, S. Kim and S. H. Choi, *Nanotechnology*, 2014, **25**, 125701-125707.
5. J. Gao, W. Y. Wang, L. J. Chen, X. Y. Hu and H. Z. Geng, *Applied Surface Science*, 2013, **277**, 128-133.
6. I. N. Kholmanov, M. D. Stoller, J. Edgeworth, W. Lee, H. F. Li, J. Lee, C. Barnhart, J. R. Potts, R. Piner, D. Akinwande, J. E. Barrick and R. S. Ruoff, *ACS Nano*, 2012, **6**, 5157-5163.
7. H. W. Tien, S. T. Hsiao, W. H. Liao, Y. H. Yu, F. C. Lin, Y. S. Wang, S. M. Li and C. C. M. Ma, *Carbon*, 2013, **58**, 198-207.
8. Y. S. Yun, D. H. Kim, B. Kim, H. H. Park and H. J. Jin, *Synthetic Metals*, 2012, **162**, 1364-1368.
9. X. Zhang, X. b. Yan, J. t. Chen and J. p. Zhao, *Carbon*, 2014, **69**, 437-443.
10. S. H. Domingues, I. N. Kholmanov, T. Kim, J. Kim, C. Tan, H. Chou, Z. A. Alieva, R. Piner, A. J. G. Zarbin and R. S. Ruoff, *Carbon*, 2013, **63**, 454-459.
11. H. W. Tien, Y. L. Huang, S. Y. Yang, J. Y. Wang and C. C. M. Ma, *Carbon*, 2011, **49**, 1550-1560.
